# Supplementary material for: Nanofibrous Membrane with Encapsulated Glucose Oxidase for Self-Sustained Antimicrobial Applications
Source: MDPI journal article supplement (doi:10.3390/membranes11120997), 2021-12-20
Supplement: s1 [file s1]

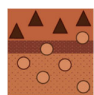

# Nanofibrous Membrane with Encapsulated Glucose Oxidase for Self-Sustained Antimicrobial Applications

Fernaldy Leonarta, Cheng-Kang Lee \*

Department of Chemical Engineering, National Taiwan University of Science and Technology, Taipei 106, Taiwan, Republic of China

\* Correspondence: cklee@mail.ntust.edu.tw

## Supplementary Materials

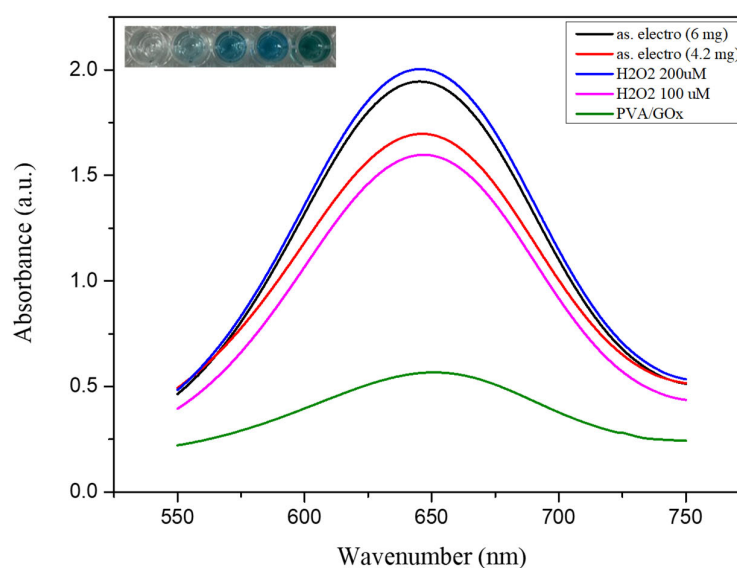

**Figure S1** UV-vis absorption spectra of HRP-TMB solution containing different H<sub>2</sub>O<sub>2</sub> concentrations and samples

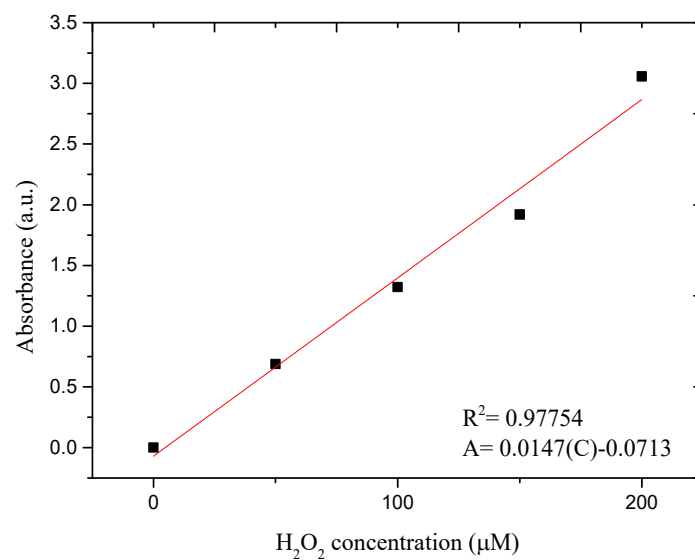

**Figure S2** Standard curve showing the relation between H<sub>2</sub>O<sub>2</sub> concentration and absorbance at  $\lambda=650\text{nm}$

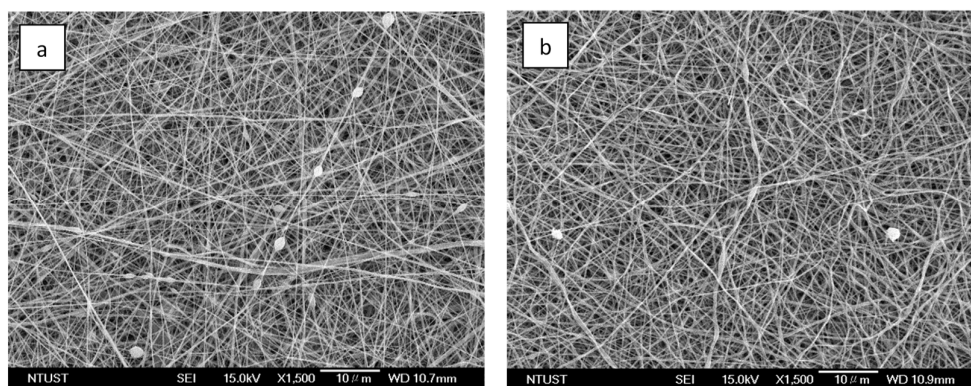

**Figure S3** FE-SEM micrographs of simultaneously co-electrospun GOx/Glu nanofibrous membrane; (a): before GA vapor crosslinking, (b): after GA Vapor crosslinking under lower magnification
